# Supplementary material for: Characterization of the Phase-Variable Autotransporter Lav Reveals a Role in Host Cell Adherence and Biofilm Formation in Nontypeable Haemophilus influenzae
Source: PubMed Central journal article supplement (PMC9022572; doi:10.1128/iai.00565-21), 2022-03-08
Supplement: iai.00565-21-s0001.pdf [file iai.00565-21-s0001.pdf]

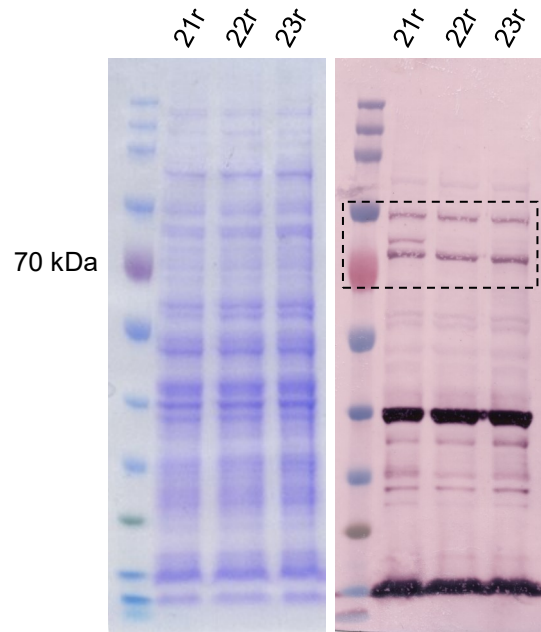

**Supplementary Figure 1** - Full anti-Lav Western Blot and corresponding Coomassie gel. Whole-cell lysates from NTHi strain 86-028 NP with 21 SSR repeats (21r), 22 SSR re-peats (22r) or 23 SSR repeats (23r) present in the lav gene were run on a 4-12% Bis-Tris SDS PAGE gel and Coomassie stained to show standardised loading (A). Western Blotting (B) with mouse anti-Lav sera shows an SSR tract number of 21 (21r) puts the gene in-frame, and ON, with Lav protein detected at ~72kDa. The 22r and 23r populations have the lav gene out-of-frame and OFF, with no corresponding band detected in these samples.

**A****Adherence Inputs**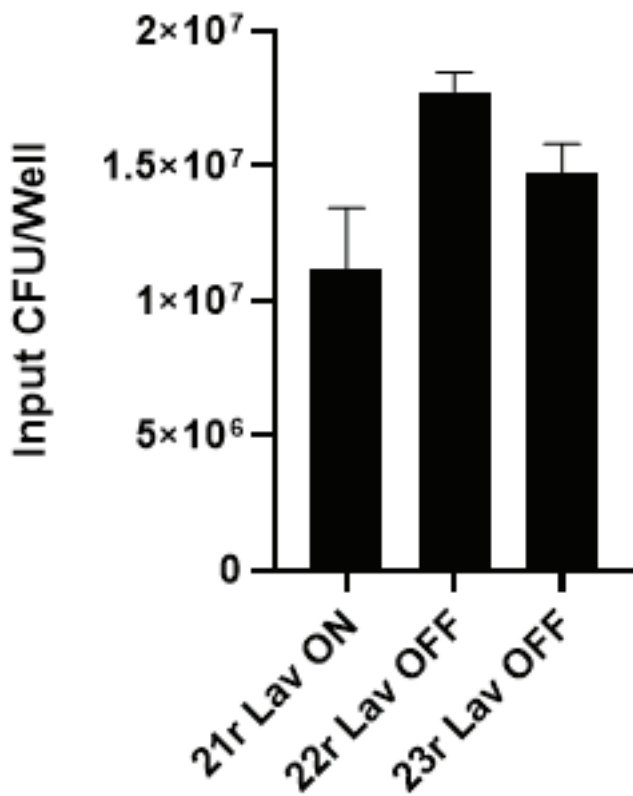**B****Adherence MOI**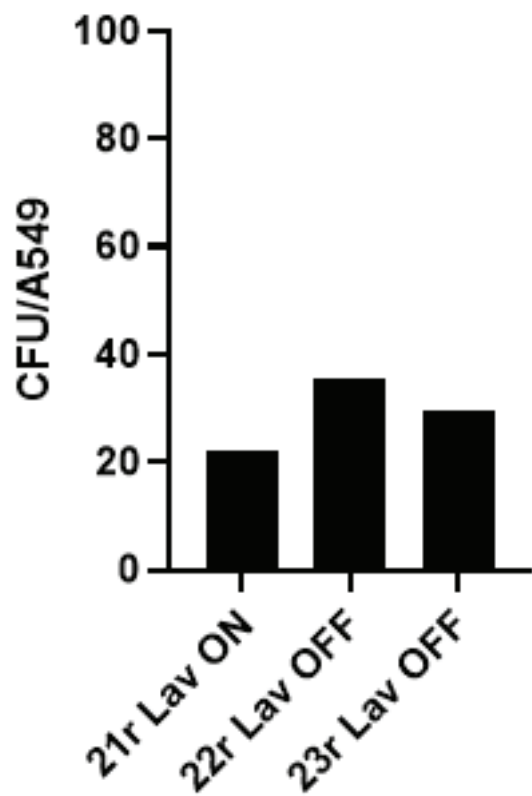**C****Invasion Inputs**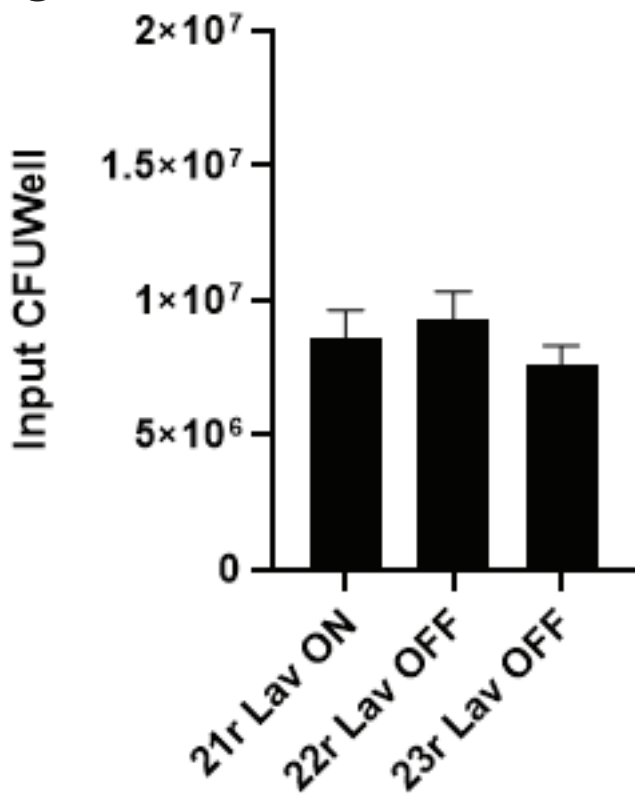**D****Invasion MOIs**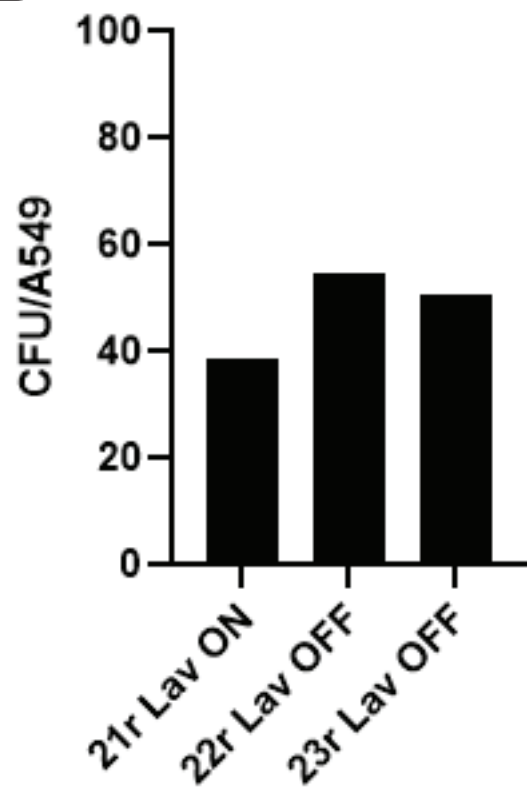

Supplementary Figure 2 – input CFU per strain used in adherence and invasion assays

## A) Enriched Lav populations *in vitro*

| Day   | <i>lav</i> % ON;<br>in sBHI Broth |         |         | <i>lav</i> % ON;<br>on sBHI Agar |         |         |
|-------|-----------------------------------|---------|---------|----------------------------------|---------|---------|
|       | 21r ON                            | 22r OFF | 23r OFF | 21r ON                           | 22r OFF | 23r OFF |
| input | 80.6                              | 17.4    | 17.3    | 80.6                             | 17.4    | 17.3    |
| 1     | 87.5                              | 12.3    | 18.1    | 91.3                             | 9.1     | 9.3     |
| 2     | 89.8                              | 13.4    | 11.9    | 91.3                             | 9.2     | 9.2     |
| 3     | 87                                | 14.4    | 14.1    | 91.4                             | 8.8     | 9.3     |
| 4     | 89                                | 13.7    | 12.9    | 91.1                             | 8.8     | 12.7    |
| 5     | 80.1                              | 16.9    | 14      | 91                               | 9.4     | 10.1    |

## B) A549 adherence and invasion assays

| <i>lav</i> % ON; 21r ON |               |              |        | <i>lav</i> % ON; 22r OFF |               |              |        | <i>lav</i> % ON; 23r OFF |               |              |        |
|-------------------------|---------------|--------------|--------|--------------------------|---------------|--------------|--------|--------------------------|---------------|--------------|--------|
| Input                   | Adherence Out | Invasion Out | SSR No | Input                    | Adherence Out | Invasion Out | SSR No | Input                    | Adherence Out | Invasion Out | SSR No |
| 90.40%                  | 90.10%        | 89.50%       | 21     | 8.50%                    | 9.60%         | 10.80%       | 22     | 9.00%                    | 11.50%        | 12.00%       | 23     |
|                         | 90.10%        | 89.60%       | 21     |                          | 10.20%        | 10.70%       | 22     |                          | 11.00%        | 11.00%       | 23     |
|                         | 90.50%        | 89.80%       | 21     |                          | 10.50%        | 10.40%       | 22     |                          | NA            | 11.10%       | 23     |

| <i>lic1A</i> % ON; 21r ON |               |              |        | <i>lic1A</i> % ON; 22r OFF |               |              |        | <i>lic1A</i> % ON; 23r OFF |               |              |        |
|---------------------------|---------------|--------------|--------|----------------------------|---------------|--------------|--------|----------------------------|---------------|--------------|--------|
| Input                     | Adherence Out | Invasion Out | SSR No | Input                      | Adherence Out | Invasion Out | SSR No | Input                      | Adherence Out | Invasion Out | SSR No |
| 92.40%                    | 93.70%        | 94.00%       | 12     | 92.90%                     | 93.90%        | 94.20%       | 12     | 93.00%                     | 95.20%        | 93.60%       | 12     |
|                           | 93.20%        | 93.70%       | 12     |                            | 94.00%        | 93.90%       | 12     |                            | 94.30%        | 94.00%       | 12     |
|                           | 93.40%        | 94.60%       | 12     |                            | 95.90%        | 94.60%       | 12     |                            | NA            | 93.60%       | 12     |

## C) Nasal airway epithelial cell adherence assays

| <i>lav</i> % ON; 21r ON |               |        | <i>lav</i> % ON; 22r OFF |               |        | <i>lav</i> % ON; 23r OFF |               |        |
|-------------------------|---------------|--------|--------------------------|---------------|--------|--------------------------|---------------|--------|
| Input                   | Adherence Out | SSR No | Input                    | Adherence Out | SSR No | Input                    | Adherence Out | SSR No |
| 89.90%                  | 90.20%        | 21     | 9.70%                    | 9.40%         | 22     | 10.30%                   | 10.20%        | 23     |
|                         | 90.00%        | 21     |                          | 9.40%         | 22     |                          | 10.60%        | 23     |
|                         | 89.60%        | 21     |                          | 10.70%        | 22     |                          | 10.70%        | 23     |

| <i>lic1A</i> % ON; 21r ON |               |        | <i>lic1A</i> % ON; 22r OFF |               |        | <i>lic1A</i> % ON; 23r OFF |               |        |
|---------------------------|---------------|--------|----------------------------|---------------|--------|----------------------------|---------------|--------|
| Input                     | Adherence Out | SSR No | Input                      | Adherence Out | SSR No | Input                      | Adherence Out | SSR No |
| 96.70%                    | 97.30%        | 12     | 97.00%                     | 96.80%        | 12     | 96.60%                     | 96.70%        | 12     |
|                           | 97.00%        | 12     |                            | 97.00%        | 12     |                            | 95.70%        | 12     |
|                           | 96.90%        | 12     |                            | 97.10%        | 12     |                            | 97.00%        | 12     |

**Supplementary Figure 3. Fragment analysis results to demonstrate stable expression of *lav* and *lic1A*.** **A) Results from multiple sub cultures of enriched Lav populations** 21r ON, 22r OFF and 23r OFF on sBHI agar and in sBHI broth over a period of 5 days. Fresh sBHI plates or sBHI broth were reinoculated with a sample of the previous days' growth over five days; **B) Inputs and outputs of the A549 adherence and invasion assays** were used as a template in fragment analysis PCR reactions using either Lav\_F+R primers, or Lic1A\_F+R primers and checked for changes in the simple sequence repeat number present in each gene in order to determine if phase-variation of *lav* (top) or *lic1A* (bottom) was occurring in our enriched Lav populations (21r ON, 22r OFF and 23r OFF) during these assays; and **C) Inputs and outputs of the nasal airway epithelial cell adherence assays** were used as a template in fragment analysis PCR reactions using either Lav\_F+R primers, or Lic1A\_F+R primers and checked for changes in the simple sequence repeat number present in each gene in order to determine if phase-variation of *lav* (top) or *lic1A* (bottom) was occurring in our enriched Lav populations (21r ON, 22r OFF and 23r OFF) during these assays. NA = we were unable to generate a PCR product for either *lav* or *lic1A* from this archived sample despite multiple attempts. All assays were carried out in triplicate with each output result equating to one replicate. SSR No = majority number of simple sequence repeats present in the respective tract based on PCR amplicon size
